# Supplementary material
Source: Springer Nature journal article supplement (https://www.springermedizin.de/resource/supplementary/12936_2008_631_MOESM2_ESM.pdf/9547862)

### A Pyrethrum spray (Rooms)

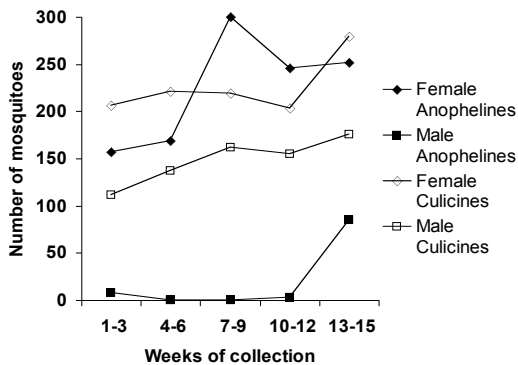

### B Search (Rooms)

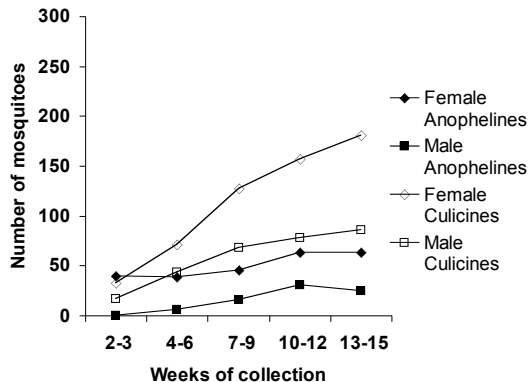

### C Light traps (Rooms)

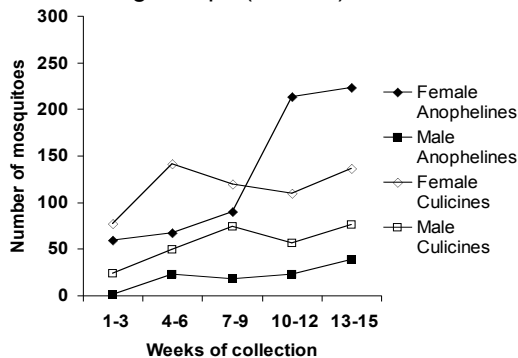

### D Light traps (Wells)

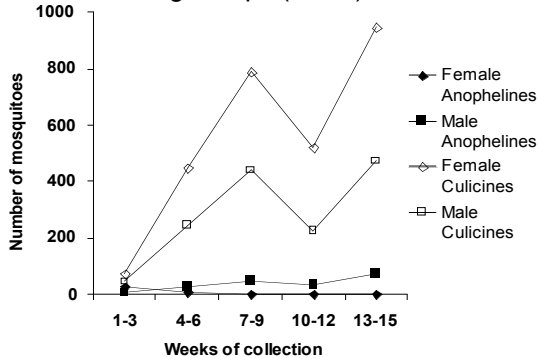

### E Mean Daily Humidity

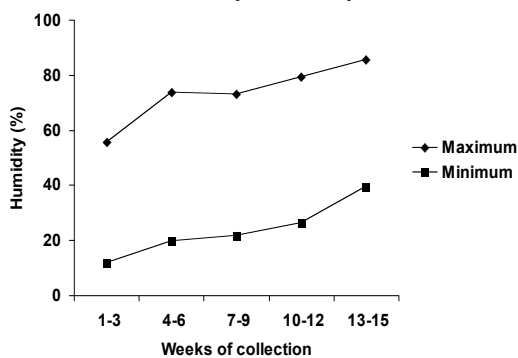

### F Mean Daily Temperature

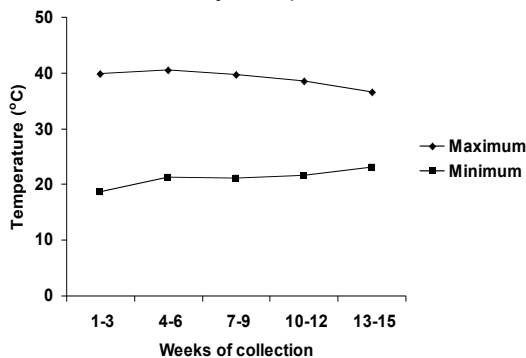

Supplement: MOESM2 [file 9547862]
